# Supplementary material for: Molecularly Targeted Therapies for Gastric Cancer. State of the Art
Source: MDPI journal article supplement (doi:10.3390/cancers13164094), 2021-08-14
Supplement: s1 [file s1]

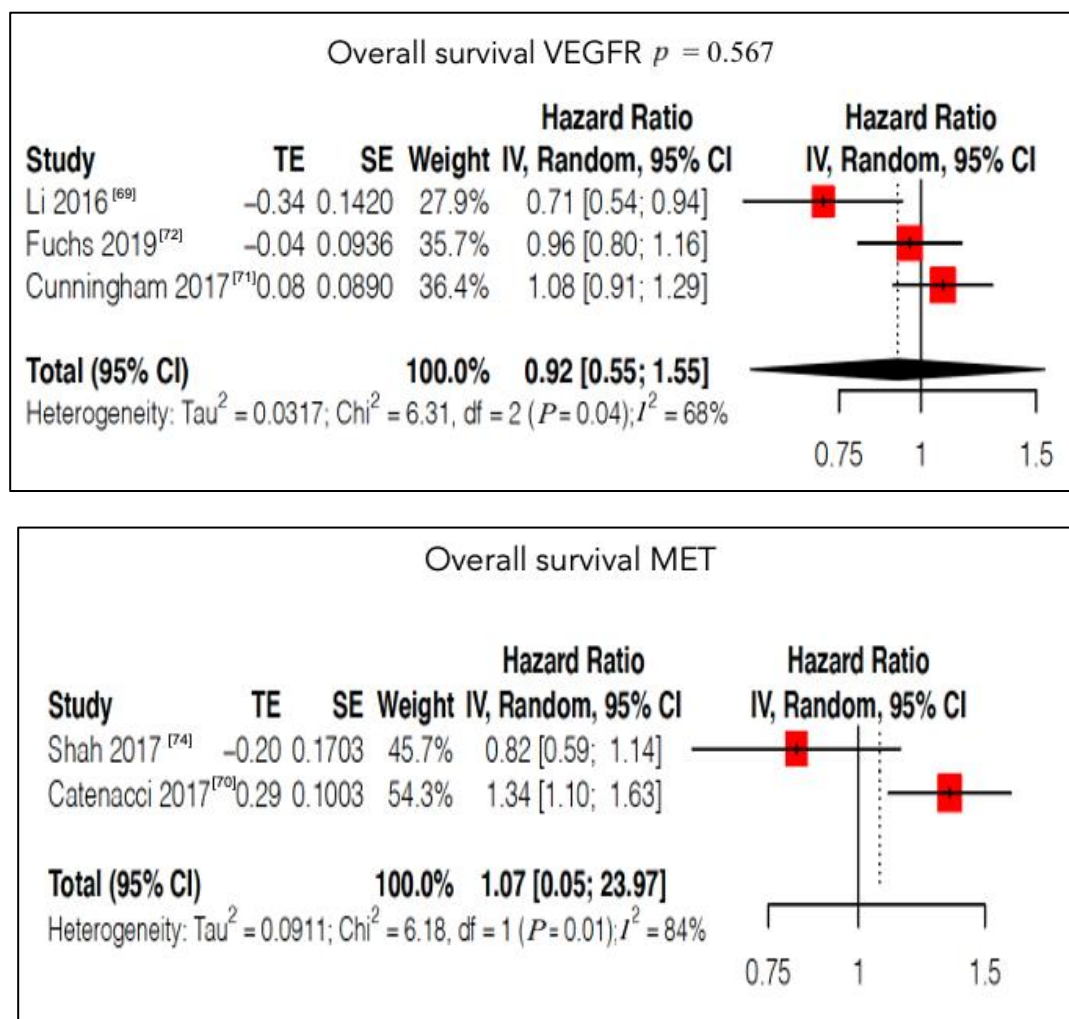

**Figure S1.** Forest plot of comparison: molecular-targeted therapy alone/plus chemotherapy versus chemotherapy alone/placebo. Main analyses; outcome: Overall Survival. Analysis of subgroups by type of molecular therapy (anti-VEGFR and anti-MET).

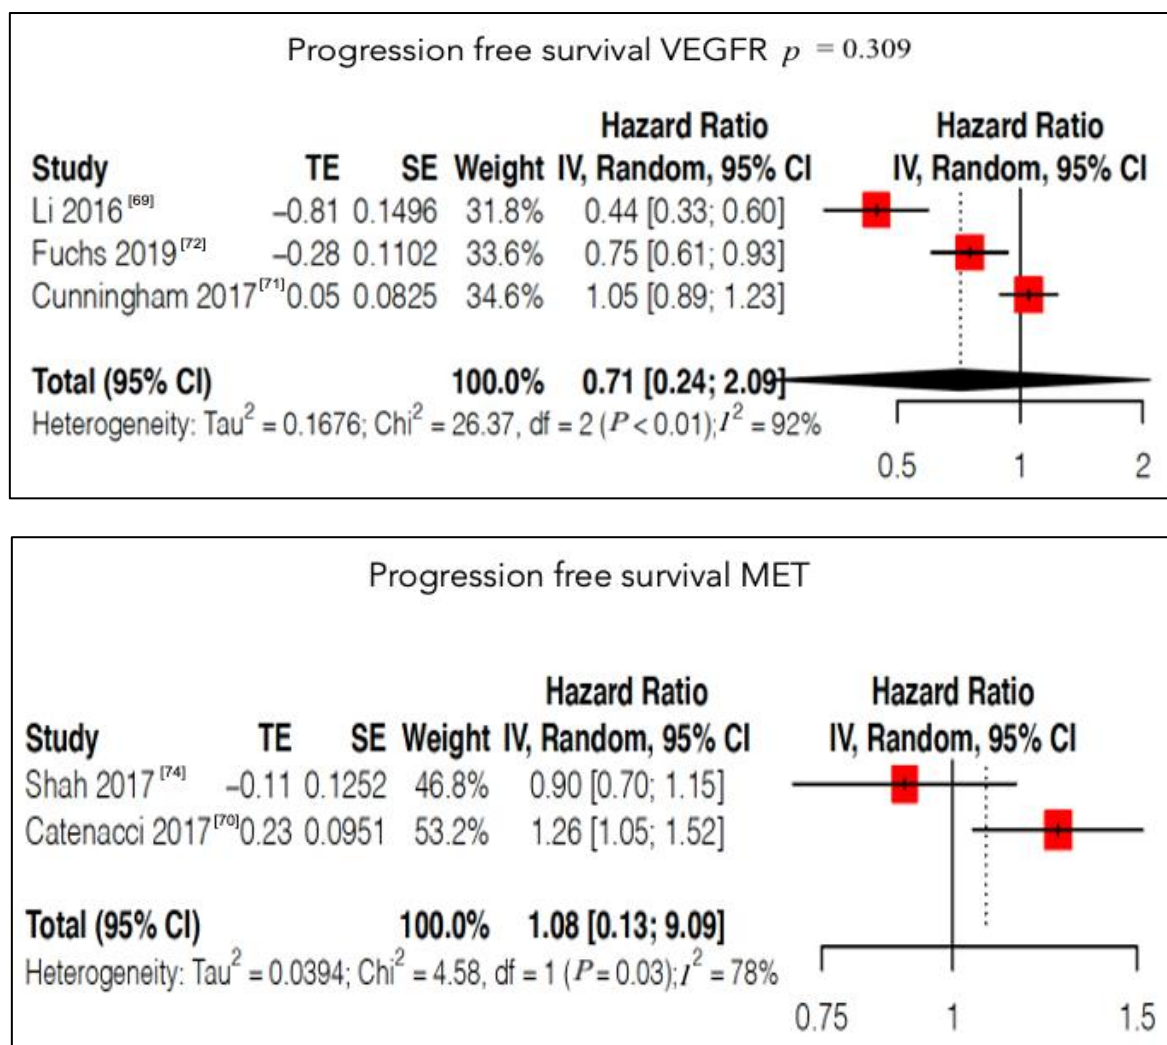

**Figure S2.** Forest plot of comparison: molecular-targeted therapy alone/plus chemotherapy versus chemotherapy alone/placebo. Main analyses; outcome: Progression Free Survival. Analysis of subgroups by type of molecular therapy (anti-VEGFR and anti-MET).

**Table S1.** Patient characteristics of studies included in the last Cochrane review.

| Author, Year, Acronym        | Nr Total pts (EXP/CTR) | Treatment Line (%) | Primary Endpoint   | Setting | Molecular Target | EXP Arm                                      | CTR Arm                       | Tumor Stage (%) | Tumor Site (%)                      |
|------------------------------|------------------------|--------------------|--------------------|---------|------------------|----------------------------------------------|-------------------------------|-----------------|-------------------------------------|
| Bang [12], 2010 ToGA         | 594(294/290)           | I<br>II            | OS                 | Adj     | HER-2            | Trastuzuma b + fluoropyrimidine + cisplatin  | Fluoropyrimidine + cisplatin  | III<br>IV       | Stomach<br>GEJ                      |
| Eatock {76}, 2013            | 171 (56 + 59/56)       | I<br>II            | PFS                | Adj     | VEGF-A           | Trebananib + CX                              | CX                            | IV              | Stomach<br>GEJ<br>Distal oesophagus |
| Hecht [58], 2013             | 545 ( 272 /273)        | I<br>II            | OS                 | Adj     | HER-2            | Lapatinib + XELOX                            | Placebo+ XELOX                | III<br>IV       | Stomach<br>GEJ<br>Oesophagus        |
| Iveson [77], 2014            | 121 (42 + 40/39)       |                    | OS                 | Adj     | HGF              | rilotumuma b + ECX                           | Placebo + ECX                 | III<br>IV       | Stomach<br>GEJ                      |
| Koizumi [78], 2013           | 93 ( 46 /47)           | I                  | PFS                | Adj     | VEGFR-2          | Orantinib + S-1/CDDP                         | S-1/CDDP                      | III             | Stomach                             |
| Lordick [61], 2013 EXPAND    | 904 (455 / 449)        | I<br>II            | PFS                | Adj     | EGFR             | Cetuximab+ capecitabine and cisplatin        | capecitabine and cisplatin    | IV<br>III       | Stomach<br>GEJ                      |
| Ohtsu [40], 2011 AVAGAST     | 774 (387 /387 )        | I                  | OS                 | Adj     | VEGF             | bevacizuma b + capecitabine and cisplatin/FU | capecitabine and cisplatin/FU | III<br>IV       | Stomach<br>GEJ                      |
| Rao [79], 2010               | 72 (36/36)             | I                  | Objective response | Adj     | EGFR             | Matuzumab + ECX                              | ECX                           | IV              | Stomach<br>EGJ<br>Distal oesophagus |
| Shen [80], 2015 AVATAR Study | 202 ( 100 /102)        | I                  | OS                 | Adj     | VEGFR            | Bevacizuma b + CX                            | CX                            | III<br>IV       | Stomach<br>GEJ                      |
| Waddell [55], 2013 REAL3     | 553(278/275)           | I                  | OS                 | Adj     | HER-1            | Panitumuma b + EOC                           | EOC                           | III<br>IV       | Stomach<br>EGJ<br>Oesophagus        |
| Zhang [81], 2014             | 56 (30/26)             | I<br>II            | OS                 | Adj     | EGFR             | Cetuximab + S-1 and oxaliplatin              | S-1 and oxaliplatin           | III<br>IV       | Stomach                             |

Pts: patients; CX: cisplatin and capecitabine; XELOX: Capecitabine+ Oxaliplatin; ECX: epirubicin, cisplatin, and capecitabine; S-1: fluoropyrimidine; CDDP: cisplatin; EOC: epirubicin and oxaliplatin and capecitabine.
